# Supplementary material
Source: Elsevier journal article supplement (https://www.sciencedirect.com/science/article/pii/S2531043722001179)
Supplement: mmc1 [file S2531043722001179:mmc1.docx]

**FIGURE LEGENDS**

**Figure 1.** Study flow diagram. CPET: cardiopulmonary exercise test; ISWT: incremental shuttle walking test.

**Figure 2 (A, B, C)**. Linear correlation of the obtained peak VO2 between the CPET and the ISWT in ml*Kg-1*min-1 (A) and ml*min-1 (B); Pearson correlation test was used in both analyses. Bland Altman Graphic (C) representation between the differences in VO2 peak values in CPET and ISWT. The solid line corresponds to the difference between the means of the upper and lower limits of agreement. Abbreviations CPET, cardiopulmonary exercise test; ISWT, incremental shuttle walking test; SD, standard deviation.
